# Supplementary material
Source: PubMed Central journal article supplement (PMC2570722)
Supplement: tpc.108.058818_1.pdf [file tpc.108.058818_1.pdf]

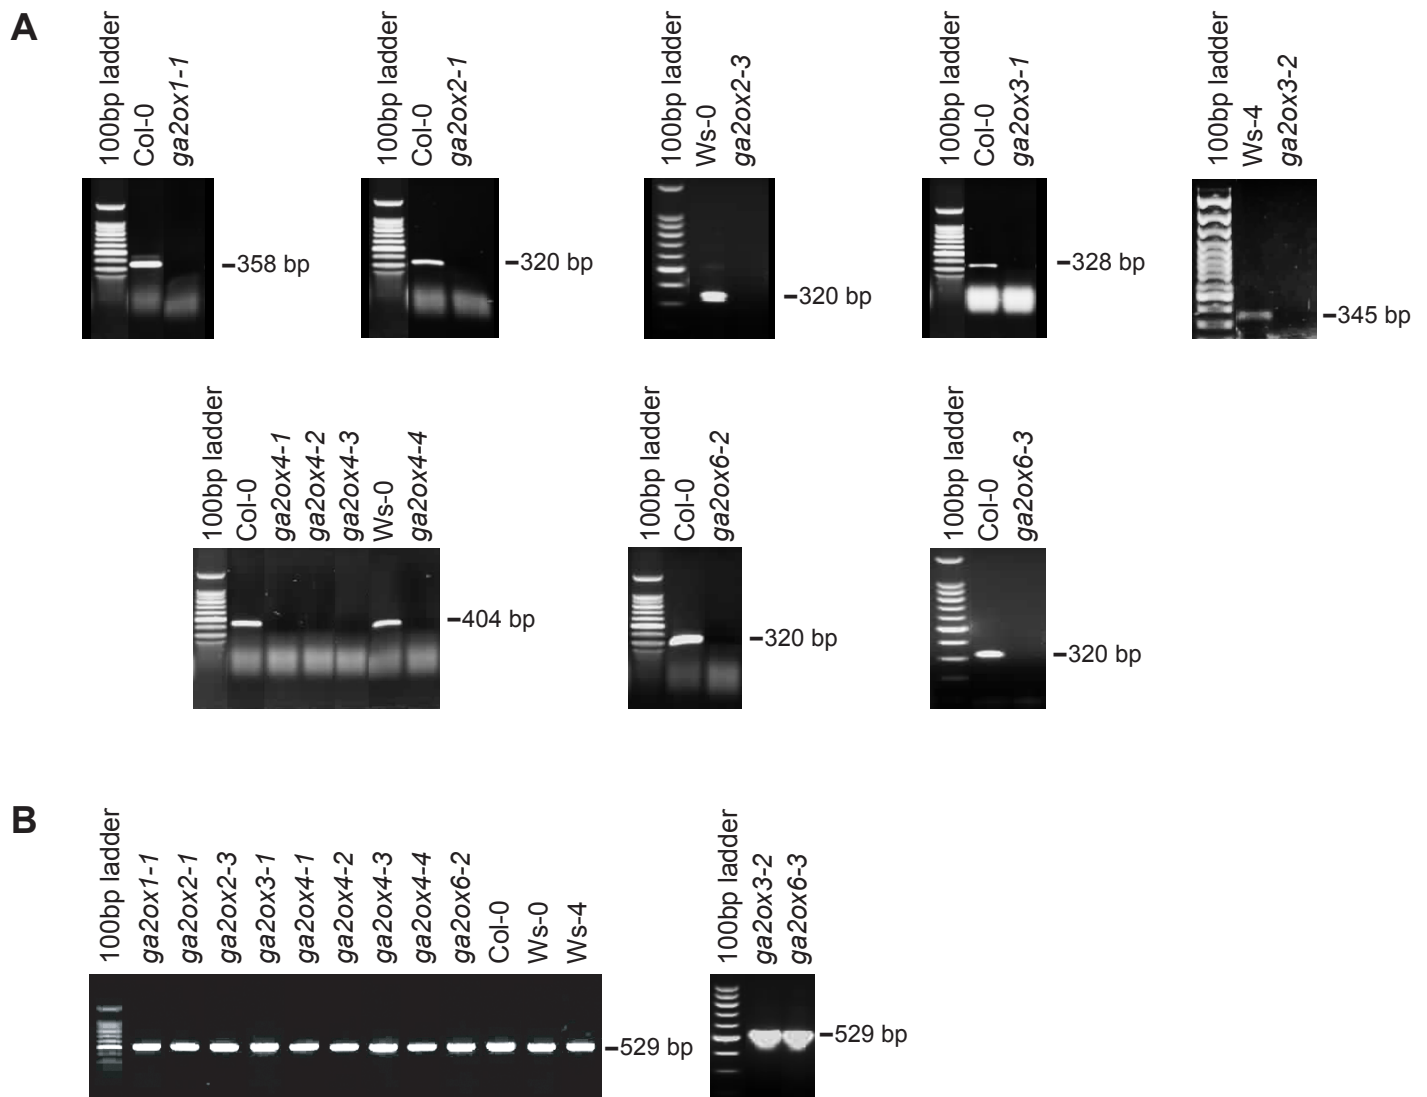

**Supplemental Figure 1 online.** RT-PCR to Confirm Null Status of Insertion Alleles Used in this Study. Total RNA was isolated from 7 day old seedlings of homozygous lines; RNA extraction, DNase treatment and reverse transcription were carried out as described previously (Griffiths et al., 2006). The resulting cDNA was used in PCR reactions with the gene-specific primers listed in Supplemental Table 11 online. (A) PCR reactions with individual alleles and their corresponding wild type lines. (B) PCR using Actin2 (*At3g18780*) primers to demonstrate presence of cDNA in all samples. bp, base pairs.

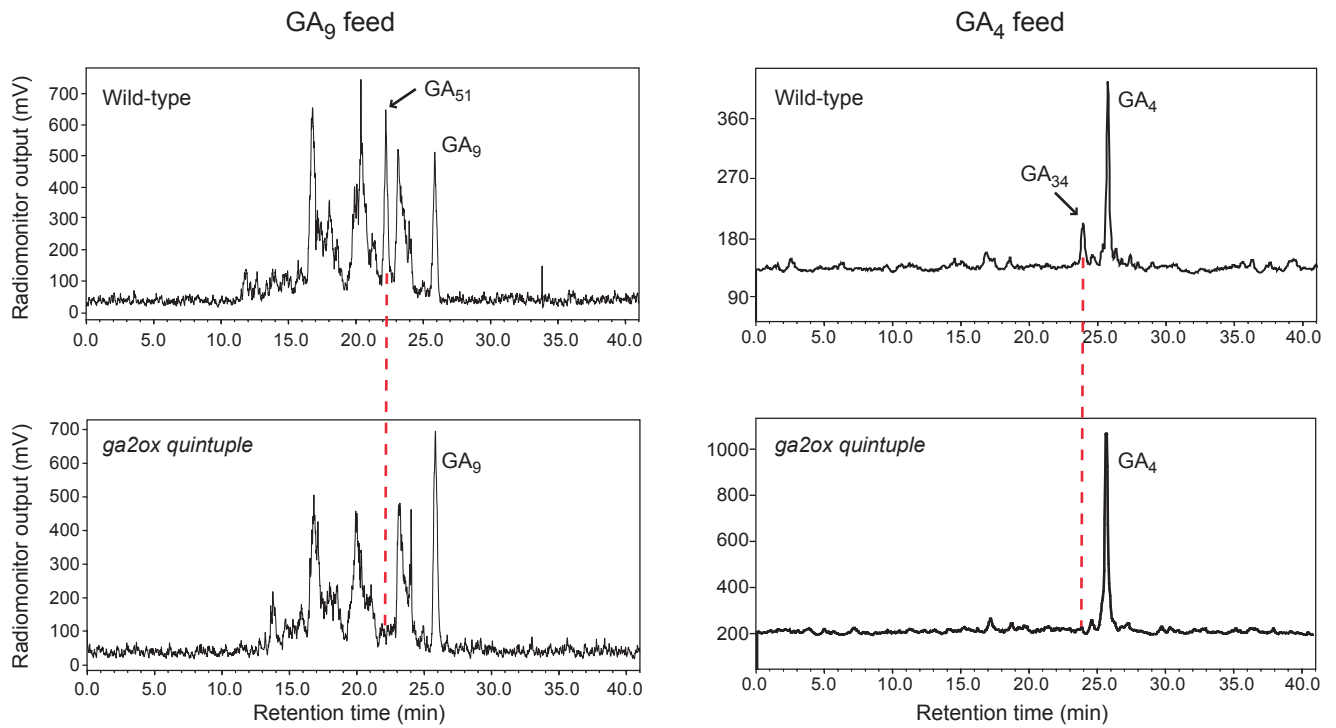

**Supplemental Figure 2 online.** Metabolism of [17-<sup>14</sup>C]GA<sub>9</sub> and [17-<sup>14</sup>C]GA<sub>4</sub> by Wild-Type and the *ga2ox quintuple* Mutant.

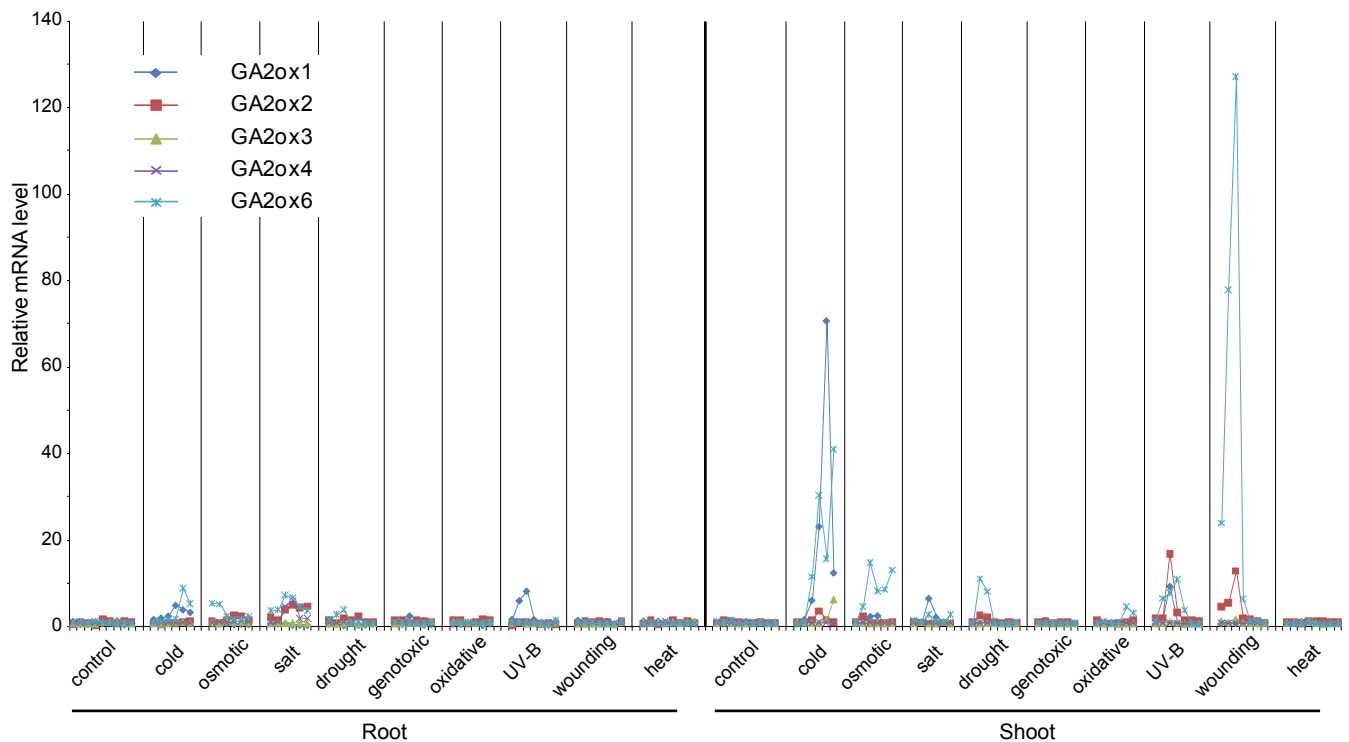

**Supplemental Figure 3 online.** Expression of  $C_{19}$ -GA2ox Genes in Response to Abiotic Stress. Microarray data were extracted from the AtGenExpress compendium (Kilian et al., 2007). Expression levels were normalized to the per-gene average across the control samples for root and shoot separately. Each treatment block represents a time series up to 24 h after start of treatment. See <http://www.weigelworld.org/resources/microarray/AtGenExpress> for a detailed description of samples.

#### Reference

**Kilian, J., Whitehead, D., Horak, J., Wanke, D., Weinl, S., Batistic, O., D'Angelo, C., Bornberg-Bauer, E., Kudla, J., and Harter, K. (2007).** The AtGenExpress global stress expression data set: protocols, evaluation and model data analysis of UV-B light, drought and cold stress responses. *Plant Journal* 50, 347-363.

**SUPPLEMENTAL TABLES ONLINE**

**Supplemental Table 1 online.** Characterisation of Insertion Lines.

| Gene          | Line             | Background | Insertion detected <sup>a</sup> | mRNA absent        | Allele name     |
|---------------|------------------|------------|---------------------------------|--------------------|-----------------|
| <i>GA2ox1</i> | WiscDsLox_333C08 | Col-0      | yes (exon 2)                    | yes <sup>b</sup>   | <i>ga2ox1-1</i> |
|               | SALK_020228      | Col-0      | yes (3' UTR)                    | no                 |                 |
|               | SALK_001079      | Col-0      | no                              | -                  |                 |
|               | FLAG_299A02      | Ws-4       | yes (5' UTR)                    | no                 |                 |
| <i>GA2ox2</i> | SALK_051749      | Col-0      | yes (exon 2)                    | yes <sup>b</sup>   | <i>ga2ox2-1</i> |
|               | Wisc_2ox2        | Ws-0       | yes (exon1)                     | yes <sup>b</sup>   | <i>ga2ox2-3</i> |
|               | GABI-KAT_541C06  | Col-0      | no                              | -                  |                 |
| <i>GA2ox3</i> | SALK_042818      | Col-0      | yes (intron 2)                  | yes <sup>b,c</sup> | <i>ga2ox3-1</i> |
|               | FLAG_088C02      | Ws-4       | yes (exon 1)                    | yes <sup>b</sup>   | <i>ga2ox3-2</i> |
|               | SALK_002824      | Col-0      | yes (5' UTR)                    | no                 |                 |
|               | Wisc_2ox3        | Ws-0       | yes (5' UTR)                    | no                 |                 |
| <i>GA2ox4</i> | SALK_036923      | Col-0      | yes (exon 2)                    | yes <sup>b</sup>   | <i>ga2ox4-1</i> |
|               | SALK_142382      | Col-0      | yes (exon 2)                    | yes <sup>b</sup>   | <i>ga2ox4-2</i> |
|               | GABI-KAT_171B04  | Col-0      | yes (exon 2)                    | yes <sup>b</sup>   | <i>ga2ox4-3</i> |
|               | Wisc_2ox4        | Ws-0       | yes (intron 1)                  | yes <sup>b</sup>   | <i>ga2ox4-4</i> |
|               | SALK_040658      | Col-0      | yes (intron 1)                  | no                 |                 |
|               | SALK_112150      | Col-0      | yes (intron 1)                  | no                 |                 |
|               | SALK_036921      | Col-0      | no                              | -                  |                 |
| <i>GA2ox6</i> | SLAT_SM_3_1859   | Col-0      | yes (intron 1)                  | yes <sup>b,c</sup> | <i>ga2ox6-2</i> |
|               | Wisc_2ox6        | Col-0      | yes (intron 1)                  | yes <sup>b</sup>   | <i>ga2ox6-3</i> |
|               | SALK_044189      | Col-0      | yes (5' UTR)                    | no                 |                 |
|               | SLAT_SM_3_42130  | Col-0      | no                              | -                  |                 |
|               | SALK_059724      | Col-0      | yes (intron 1)                  | no                 |                 |
|               | SALK_059851      | Col-0      | no                              | -                  |                 |
|               | GABI-KAT_119G12  | Col-0      | yes (intron 1)                  | no                 |                 |
|               | GABI-KAT 390B07  | Col-0      | yes (intron 1)                  | no                 |                 |

<sup>a</sup>, The structural element in which the insertion is located is indicated between parenthesis; <sup>b</sup>, see Supplemental Figure 1 online; <sup>c</sup>, see Supplemental Table 2 online; -, not determined.

**Supplemental Table 2 online.** Mean Ct Values and LSDs of Gene Expression Studies Shown in Figure 4A, B (GA-responsive genes) and of *GA2ox3* and *GA2ox6*.

| Sample                     | <i>At2g45210</i> | <i>At2g21220</i> | <i>At1g23205</i> | <i>SCL3</i>   | <i>At5g45460</i> |
|----------------------------|------------------|------------------|------------------|---------------|------------------|
| Wild type                  | 25.8 ± 0.1       | 24.9 ± 0.0       | 22.1 ± 0.1       | 23.6 ± 0.0    | 25.7 ± 0.0       |
| Wild type +GA              | 24.5 ± 0.0 **    | 23.1 ± 0.1 **    | 21.6 ± 0.1 **    | 24.6 ± 0.0 ** | 26.0 ± 0.0 **    |
| <i>ga2ox quintuple</i>     | 25.3 ± 0.1 **    | 24.3 ± 0.1 **    | 21.5 ± 0.1 **    | 24.1 ± 0.0 ** | 26.0 ± 0.0 **    |
| <i>ga2ox quintuple</i> +GA | 24.5 ± 0.1 **    | 23.0 ± 0.1 **    | 21.7 ± 0.0 *     | 24.6 ± 0.1 ** | 26.1 ± 0.1 **    |
| LSD(5%/1%) (df)            | 0.34/0.50 (8)    | 0.29/0.42 (8)    | 0.26/0.38 (8)    | 0.11/0.16 (8) | 0.15/0.21 (8)    |
| n                          | 3                | 3                | 3                | 3             | 3                |

| Sample                     | <i>GA20ox1</i> | <i>GA3ox1</i> | <i>GA2ox8</i> | <i>GID1b</i>  |
|----------------------------|----------------|---------------|---------------|---------------|
| Wild type                  | 24.9 ± 0.1     | 24.8 ± 0.1    | 28.9 ± 0.1    | 26.2 ± 0.0    |
| Wild type +GA              | 25.6 ± 0.1 **  | 25.6 ± 0.1 ** | 27.4 ± 0.1 ** | 27.4 ± 0.1 ** |
| <i>ga2ox quintuple</i>     | 25.4 ± 0.0 **  | 25.3 ± 0.1 *  | 28.2 ± 0.0 ** | 26.5 ± 0.2    |
| <i>ga2ox quintuple</i> +GA | 25.8 ± 0.1 **  | 25.8 ± 0.1 ** | 27.3 ± 0.1 ** | 27.4 ± 0.2 ** |
| LSD(5%/1%) (df)            | 0.34/0.50 (8)  | 0.33/0.49 (8) | 0.27/0.40 (8) | 0.47/0.69 (8) |
| n                          | 3              | 3             | 3             | 3             |

| Sample                     | <i>GA2ox3</i> | <i>GA2ox6</i> |
|----------------------------|---------------|---------------|
| Wild type                  | 31.4 ± 0.4    | 27.4 ± 0.1    |
| Wild type +GA              | 31.4 ± 0.1    | 28.0 ± 0.1    |
| <i>ga2ox quintuple</i>     | -             | -             |
| <i>ga2ox quintuple</i> +GA | -             | -             |
| LSD(5%/1%) (df)            | n.a.          | n.a.          |
| n                          | 3             | 3             |

See Methods for details on statistical analysis. The measurements are the mean reference-genes-corrected threshold-cycle (Ct) values ± SE. \*, significantly different from the untreated wild type (P<0.05); \*\*, significantly different from the untreated wild type (P<0.01); df, degrees of freedom; LSD, least significant difference; n.a., not applicable; -, not detected.

**Supplemental Table 3 online.** Mean Ct Values and LSDs of Gene Expression Studies Shown in Figure 4C.

| Sample          | <i>GA2ox1</i>  | <i>GA2ox2</i>  | <i>GA2ox3</i>  | <i>GA2ox4</i>  | <i>GA2ox6</i>  | <i>GA2ox7</i>  | <i>GA2ox8</i>  |
|-----------------|----------------|----------------|----------------|----------------|----------------|----------------|----------------|
| Col 0 h         | 31.9 ± 0.4     | 30.6 ± 0.1     | 35.0 ± 0.6     | 31.8 ± 0.1     | 28.8 ± 0.1     | 32.0 ± 0.2     | 29.4 ± 0.1     |
| Col 3 h mock    | 31.6 ± 0.1     | 30.5 ± 0.0     | 35.9 ± 0.3     | 31.9 ± 0.1     | 28.2 ± 0.0     | 31.0 ± 0.2     | 29.4 ± 0.0     |
| Col 3 h GA      | 29.8 ± 0.0 **  | 27.9 ± 0.0 **  | 37.5 ± 1.5     | 29.6 ± 0.1 **  | 27.6 ± 0.1 **  | 30.6 ± 0.3     | 28.8 ± 0.1 **  |
| LSD(5%/1%) (df) | 0.67/0.93 (12) | 0.30/0.43 (12) | 2.60/3.64 (12) | 0.42/0.59 (12) | 0.37/0.52 (12) | 0.84/1.18 (12) | 0.29/0.41 (12) |
| N               | 3              | 3              | 3              | 3              | 3              | 3              | 3              |

See Methods for details on statistical analysis. The measurements are the mean reference-genes-corrected threshold cycle (Ct) values ± SE.

\*\*, significantly different from the 0 h and 3 h mock controls (P<0.01); df, degrees of freedom; LSD, least significant difference.

**Supplemental Table 4 online. Germination Characteristics of Wild-type and *ga2ox* quintuple Seeds as Shown in Figure 5A.**

|                        | Dark                                                | +cold                    | +light<br>pulse      | +cold<br>+light<br>pulse |
|------------------------|-----------------------------------------------------|--------------------------|----------------------|--------------------------|
| Wild type              | 0.2 ± 0.2<br>(-6.32) <sup>a</sup>                   | 0.7 ± 0.2<br>(-4.91)     | 77.2 ± 3.5<br>(1.24) | 99.6 ± 0.2<br>(5.61)     |
| <i>ga2ox</i> quintuple | 8.8 ± 1.0<br>(-2.34) **                             | 22.1 ± 1.0<br>(-1.26) ** | 70.6 ± 1.8<br>(0.88) | 99.9 ± 0.1<br>(6.34)     |
| LSD(5%/1%) (df)        | 1.167/1.608 <sup>a</sup> (16) (for all comparisons) |                          |                      |                          |
| n                      | 3                                                   | 3                        | 3                    | 3                        |

See Methods for details on statistical analysis. The measurements are the mean germination% ± SE. \*\*, significantly different from the wild type with the same treatment (P<0.01); <sup>a</sup>, Logit-transformed values (shown in parentheses) were used for statistical analysis (see Methods), and the LSDs correspond to these values; df, degrees of freedom; LSD, least significant difference.

---

**Supplemental Table 5 online.** GerminationCharacteristics of Wild-type and *ga2ox quintuple*

Seeds after FR and PAC Treatment.

---

|                            | -PAC          | +PAC      |
|----------------------------|---------------|-----------|
| Wild type +FR              | 0.0 ± 0.0     | 0.0 ± 0.0 |
| <i>ga2ox quintuple</i> +FR | 14.8 ± 1.3 ** | 0.0 ± 0.0 |
| t-test t (df)              | 11.73 (2)     | n.a.      |
| n                          | 3             | 3         |

---

See Methods for details on statistical analysis. The measurements are the mean germination% ± SE. \*\*, significantly different from the wild type with the same treatment (P<0.01); df, degrees of freedom; FR, far-red light; LSD, least significant difference; n.a., not applicable; PAC, paclobutrazol.



**Supplemental Table 6 online.** Flowering Time under Short Day Conditions as Shown in Figure 5B, Including Single Mutants.

|                             | Number of leaves at flowering |
|-----------------------------|-------------------------------|
| Wild-type Col-0             | 66.1 ± 0.6                    |
| <i>35S::GA20ox1</i>         | 57.3 ± 0.7 **                 |
| <i>ga2ox quintuple</i>      | 58.7 ± 1.3 **                 |
| <i>ga2ox2 ga2ox4 ga2ox6</i> | 58.5 ± 0.6 **                 |
| <i>ga2ox2 ga2ox4</i>        | 57.9 ± 0.7 **                 |
| <i>ga2ox4 ga2ox6</i>        | 59.5 ± 0.6 **                 |
| <i>ga2ox2 ga2ox6</i>        | 63.6 ± 0.7 **                 |
| <i>ga2ox2</i>               | 64.3 ± 0.6 *                  |
| <i>ga2ox4</i>               | 61.6 ± 0.7 **                 |
| <i>ga2ox6</i>               | 65.1 ± 0.7                    |
| LSD(5%/1%) (df)             | 1.90/2.50 (443)               |
| n                           | 15-40                         |
| <hr/>                       |                               |
| Wild-type Col-0             | 68.0 ± 1.8                    |
| <i>ga2ox1-1</i>             | 69.2 ± 1.5                    |
| <i>ga2ox2-1</i>             | 65.0 ± 0.8                    |
| <i>ga2ox3-1</i>             | 67.0 ± 1.9                    |
| <i>ga2ox4-1</i>             | 62.8 ± 1.9 **                 |
| <i>ga2ox4-2</i>             | 62.6 ± 1.0 **                 |
| <i>ga2ox4-3</i>             | 61.1 ± 1.0 **                 |
| <i>ga2ox6-2</i>             | 67.1 ± 1.2                    |
| <hr/>                       |                               |
| Wild-type Ws-0              | 39.7 ± 0.7                    |
| <i>ga2ox2-3</i>             | 38.5 ± 0.7                    |
| <i>ga2ox4-4</i>             | 34.4 ± 0.7 **                 |
| <i>ga2ox6-3</i>             | 41.1 ± 0.4                    |

---

|                 |            |
|-----------------|------------|
| Wild-type Ws-4  | 38.9 ± 0.5 |
| <i>ga2ox3-2</i> | 40.3 ± 0.9 |

---

|                 |                 |
|-----------------|-----------------|
| LSD(5%/1%) (df) | 3.36/4.44 (202) |
| n               | 10              |

---

See Methods for details on design and statistical analysis. The two sections of the table represent separate experiments. The measurements are the means ± SE. \*, significantly different from the corresponding wild type (P<0.05); \*\*, significantly different from the corresponding wild type (P<0.01); df, degrees of freedom; LSD, least significant difference.

**Supplemental Table 7 online.** Silique Phenotype as Shown in Figure 5C and D.

|                             | Silique length<br>(mm) | Number of seeds<br>per silique |
|-----------------------------|------------------------|--------------------------------|
| Wild type                   | 14.5 ± 0.6             | 54.6 ± 4.0                     |
| Wild type + GA              | 10.4 ± 0.4 **          | 21.9 ± 2.9 **                  |
| <i>ga2ox quintuple</i>      | 10.0 ± 0.6 **          | 17.5 ± 3.4 **                  |
| <i>ga2ox quintuple</i> + GA | 10.4 ± 0.4 **          | 19.0 ± 2.6 **                  |
| LSD(5%/1%) (df)             | 1.42/1.90 (46)         | 9.52/12.70 (47)                |
| n                           | 36-55                  | 36-55                          |

See Methods for details on design and statistical analysis. The measurements are the means ± SE. \*\*, significantly different from the wild type (P<0.01); df, degrees of freedom; LSD, least significant difference.

**Supplemental Table 8 online.** Parthenocarpic Growth of *GA2ox* Mutants as Shown in Figure 6E.

|                        | Carpel length (mm) |
|------------------------|--------------------|
| Wild-type Col-0        | 5.1 ± 0.1          |
| Wild-type Col-0 + GA   | 11.5 ± 0.1 **      |
| <i>ga2ox quintuple</i> | 10.2 ± 0.1 **      |
| <i>ga2ox2</i>          | 8.0 ± 0.2 **       |
| <i>ga2ox1 ga2ox3</i>   | 5.1 ± 0.1          |
| <i>ga2ox4 ga2ox6</i>   | 5.0 ± 0.1          |
| LSD(5%/1%) (df)        | 0.48/0.64 (31)     |
| <hr/>                  |                    |
| Wild-type Ws-0         | 5.6 ± 0.1          |
| <i>ga2ox2-3</i>        | 7.3 ± 0.1 **       |
| LSD(5%/1%) (df)        | 0.43/0.59 (21)     |

See Methods for details on design and statistical analysis. The two sections of the table represent separate experiments. The measurements are the means ± SE. \*\*, significantly different from the wild type (P<0.01); df, degrees of freedom; LSD, least significant difference.

**Supplemental Table 9 online.** Phenotype of the *ga2ox* Mutants under Low-GA Conditions, Including as Shown in Figure 7B, C and D.

| Flowering time (days)  |                                                                        |                         |                         |                         |
|------------------------|------------------------------------------------------------------------|-------------------------|-------------------------|-------------------------|
| PAC (uM):              | 0                                                                      | 1                       | 5                       | 25                      |
| Wild type              | 18.7 ± 0.2<br>(2.93) <sup>a</sup>                                      | 19.0 ± 0.2<br>(2.94)    | 20.1 ± 0.4<br>(2.99)    | 21.0 ± 0.5<br>(3.04)    |
| <i>ga2ox quintuple</i> | 17.4 ± 0.1<br>(2.86) *                                                 | 17.2 ± 0.1<br>(2.85) ** | 17.9 ± 0.2<br>(2.89) ** | 17.8 ± 0.2<br>(2.88) ** |
| LSD(5%/1%) (df)        | 0.056/0.079 <sup>a</sup> (10) (for comparisons within a PAC treatment) |                         |                         |                         |
| n                      | 18                                                                     | 18                      | 18                      | 18                      |

  

| Total plant height (cm) |                                                        |               |               |               |
|-------------------------|--------------------------------------------------------|---------------|---------------|---------------|
| PAC (uM):               | 0                                                      | 1             | 5             | 25            |
| Wild type               | 52.2 ± 0.7                                             | 26.3 ± 0.9    | 10.2 ± 0.5    | 6.8 ± 0.5     |
| <i>ga2ox quintuple</i>  | 57.8 ± 0.7 **                                          | 44.0 ± 0.6 ** | 27.5 ± 0.9 ** | 14.0 ± 1.1 ** |
| LSD(5%/1%) (df)         | 2.42/3.52 (8) (for comparisons within a PAC treatment) |               |               |               |
| n                       | 18                                                     | 18            | 18            | 18            |

  

| No. of flowers / inflorescence internodes |                                                        |               |               |               |
|-------------------------------------------|--------------------------------------------------------|---------------|---------------|---------------|
| PAC (uM):                                 | 0                                                      | 1             | 5             | 25            |
| Wild type                                 | 55.4 ± 1.5                                             | 52.5 ± 1.0    | 40.9 ± 1.0    | 36.0 ± 1.0    |
| <i>ga2ox quintuple</i>                    | 63.2 ± 1.5 **                                          | 61.6 ± 1.4 ** | 57.3 ± 1.6 ** | 45.8 ± 0.8 ** |
| LSD(5%/1%) (df)                           | 4.93/7.18 (8) (for comparisons within a PAC treatment) |               |               |               |
| n                                         | 18                                                     | 18            | 18            | 18            |

  

| Rosette radius (mm)    |                                                         |              |               |               |
|------------------------|---------------------------------------------------------|--------------|---------------|---------------|
| PAC (uM):              | 0                                                       | 1            | 5             | 25            |
| Wild type              | 58.5 ± 0.9                                              | 51.9 ± 1.0   | 48.8 ± 0.9    | 38.3 ± 1.0    |
| <i>ga2ox quintuple</i> | 59.0 ± 0.8                                              | 56.2 ± 0.6 * | 54.9 ± 0.6 ** | 46.9 ± 0.9 ** |
| LSD(5%/1%) (df)        | 3.44/4.89 (10) (for comparisons within a PAC treatment) |              |               |               |
| n                      | 18                                                      | 18           | 18            | 18            |

|                        | No. of vegetative internodes                             |             |               |                |
|------------------------|----------------------------------------------------------|-------------|---------------|----------------|
|                        | PAC (uM): 0                                              | 1           | 5             | 25             |
| Wild type              | 2.61 ± 0.12                                              | 2.50 ± 0.12 | 1.89 ± 0.18   | 1.28 ± 0.21    |
| <i>ga2ox quintuple</i> | 2.67 ± 0.11                                              | 2.83 ± 0.09 | 2.61 ± 0.12 * | 2.28 ± 0.11 ** |
| LSD(5%/1%) (df)        | 0.594/0.864 (8) (for comparisons within a PAC treatment) |             |               |                |
| n                      | 18                                                       | 18          | 18            | 18             |

|                        | Length of vegetative internodes (cm)                                  |                          |                          |                          |
|------------------------|-----------------------------------------------------------------------|--------------------------|--------------------------|--------------------------|
|                        | PAC (uM): 0                                                           | 1                        | 5                        | 25                       |
| Wild type              | 3.45 ± 0.19<br>(1.86) <sup>b</sup>                                    | 1.96 ± 0.13<br>(1.40)    | 0.76 ± 0.05<br>(0.87)    | 0.45 ± 0.07<br>(0.67)    |
| <i>ga2ox quintuple</i> | 3.43 ± 0.12<br>(1.85)                                                 | 2.60 ± 0.12<br>(1.61) ** | 1.49 ± 0.06<br>(1.22) ** | 0.79 ± 0.10<br>(0.89) ** |
| LSD(5%/1%) (df)        | 0.064/0.094 <sup>b</sup> (8) (for comparisons within a PAC treatment) |                          |                          |                          |
| n                      | 18                                                                    | 18                       | 18                       | 18                       |

See Methods for details on statistical analysis. The measurements are the means ± SE. \*, significantly different from *ga20ox1-3* (P<0.05); \*\*, significantly different from *ga20ox1-3* (P<0.01); <sup>a</sup>, Log-transformed values (shown in parentheses) were used for statistical analysis (see Methods), and the LSDs correspond to these values; <sup>b</sup>, Square-root-transformed values (shown in parentheses) were used for statistical analysis (see Methods), and the LSDs correspond to these values; df, degrees of freedom; LSD, least significant difference.

**Supplemental Table 10 online.** Suppression of the *ga20ox1-3* Phenotype by *ga20ox2-1* as Shown in Figure 7E.

|                            | Total plant height (cm) | Length of vegetative stem (cm) | Length of inflorescence stem (cm) |
|----------------------------|-------------------------|--------------------------------|-----------------------------------|
| Wild type                  | 61.4 ± 3.6 **           | 15.7 ± 1.7 **                  | 45.8 ± 1.9 **                     |
| <i>ga20ox2-1</i>           | 60.1 ± 2.5 **           | 13.2 ± 0.6 **                  | 46.9 ± 2.6 **                     |
| <i>ga20ox1-3</i>           | 26.7 ± 1.9              | 4.8 ± 0.5                      | 22.1 ± 1.4                        |
| <i>ga20ox1-3 ga20ox2-1</i> | 41.2 ± 1.5 *            | 6.7 ± 0.5                      | 34.3 ± 1.0 *                      |
| LSD(5%/1%) (df)            | 11.54/17.56 (7)         | 3.50/5.33 (7)                  | 11.49/18.02 (7)                   |
| n                          | 3-7                     | 3-7                            | 3-7                               |

See Methods for details on statistical analysis. The measurements are the means ± SE. \*, significantly different from *ga20ox1-3* (P<0.05); \*\*, significantly different from *ga20ox1-3* (P<0.01); df, degrees of freedom; LSD, least significant difference.

**Supplemental Table 11 online.** Primers Used for Genotyping, Real-time Quantitative RT-PCR and Preparation of Standard Curves.

| GENOTYPING      |                                  |                                                                                            |
|-----------------|----------------------------------|--------------------------------------------------------------------------------------------|
| Primer          | Sequence                         | Used for                                                                                   |
| GA2ox1 gF       | TCTTCCGGTTCGATATCTCCCA           | Genotyping <i>ga2ox1-1</i> (wild-type allele: 1350bp)                                      |
| GA2ox1 gR       | TGACCAAACACGGACTCGAT             |                                                                                            |
| GA2ox2 gF       | CTGCGAGGAGTTCGGGTCTT             | Genotyping <i>ga2ox2-1</i> (wild-type allele: 1100bp)                                      |
| GA2ox2 gR       | TTTTTGTCGACCCTCCACACC            |                                                                                            |
| GA2ox2 gF       | see above                        | Genotyping <i>ga2ox2-3</i> (wild-type allele: 1100bp)                                      |
| GA2ox2 gR       | see above                        |                                                                                            |
| GA2ox3 gF1      | TTGAAAATTTGTCCTTTAACCCCA         | Genotyping <i>ga2ox3-1</i> (wild-type allele: 1150bp)                                      |
| GA2ox3 gR1      | TCCGGATGTGAAAACCTGAAATCAA        |                                                                                            |
| GA2ox3 gF2      | CCACTCGAATTCAAATCCGCATA          | Genotyping <i>ga2ox3-2</i> (wild-type allele: 1100bp)                                      |
| GA2ox3 gR2      | TAACCCCTGTTTCTCGCCGTT            |                                                                                            |
| GA2ox4 gF1      | TGACAGCTCGGCAGTGAATTG            | Genotyping <i>ga2ox4-1</i> (wild-type allele: 1100bp)                                      |
| GA2ox4 gR1      | TGGGGTATCACATTTACCTCAA           |                                                                                            |
| GA2ox4 gF1      | see above                        | Genotyping <i>ga2ox4-2</i> (wild-type allele: 1100bp)                                      |
| GA2ox4 gR1      | see above                        |                                                                                            |
| GA2ox4 gF1      | see above                        | Genotyping <i>ga2ox4-3</i> (wild-type allele: 1100bp)                                      |
| GA2ox4 gR1      | see above                        |                                                                                            |
| GA2ox4 gF2      | TTCGCTCTCAGCTCTCCTTCA            | Genotyping <i>ga2ox4-4</i> (wild-type allele: 1150bp)                                      |
| GA2ox4 gR2      | GTCACTATCGACGGAGCTGATTA          |                                                                                            |
| GA2ox6 gF1      | TTGTCAACCGTATGGAAACCG            | Genotyping <i>ga2ox6-2</i> (wild-type allele: 950bp)                                       |
| GA2ox6 gR1      | CAACCAAGAACCAACGATTGC            |                                                                                            |
| GA2ox6 gF1      | see above                        | Genotyping <i>ga2ox6-3</i> (wild-type allele: 950bp)                                       |
| GA2ox6 gR1      | see above                        |                                                                                            |
| WiscDs-Lox p745 | AACGTCCGCAATGTGTTATTAAGT<br>TGTC | Genotyping <i>ga2ox1-1</i> (mutant allele, with GA2ox1 gF: 1300bp)                         |
| SALK LBa1       | TGGTTCACGTAGTGGGCCATCG           | Genotyping <i>ga2ox2-1</i> (mutant allele, with GA2ox2 gR: 600bp), <i>ga2ox3-1</i> (mutant |



|               |                                    |                                                                                                                                                                                      |
|---------------|------------------------------------|--------------------------------------------------------------------------------------------------------------------------------------------------------------------------------------|
|               |                                    | allele, with GA2ox3 gR1: 850bp), <i>ga2ox4-1</i> (mutant allele, with GA2ox4 gR1: 1100bp), <i>ga2ox4-2</i> (mutant allele, with GA2ox4 gF1: 650bp)                                   |
| JL-202        | CATTTTATAATAACGCTGCGGACA<br>TACTAC | Genotyping <i>ga2ox2-3</i> (mutant allele, with GA2ox2 gR: 1200bp), <i>ga2ox4-4</i> (mutant allele, with GA2ox4 gF2: 350bp), <i>ga2ox6-3</i> (mutant allele, with GA2ox6 gF1: 750bp) |
| GABI_LBo8409  | ATATTGACCATCATACTCATTGC            | Genotyping <i>ga2ox4-3</i> (mutant allele, with GA2ox4 gF1: 300bp)                                                                                                                   |
| FLAG_LB4      | CGTGTGCCAGGTGCCACGGAATA<br>GT      | Genotyping <i>ga2ox3-2</i> (mutant allele, with GA2ox3 gR2: 550bp),                                                                                                                  |
| SLAT 3' dspm1 | CTTATTTTCAGTAAGAGTGTGGGGT<br>TTTGG | Genotyping <i>ga2ox6-2</i> (mutant allele, with GA2ox6 gR1: 400bp)                                                                                                                   |

| RT-PCR TESTING NULL STATUS OF INSERTION ALLELES |                         |                                   |
|-------------------------------------------------|-------------------------|-----------------------------------|
| Primer                                          | Sequence                | Used for                          |
| GA2ox1 KOF                                      | TGACCAAAACACGGACTCGAT   | RT-PCR of <i>ga2ox1</i> mutants.  |
| GA2ox1 KOR                                      | CGGAGCGATTCTCTGAGTCAA   | Wild type allele 358 bp.          |
| GA2ox2 KOF                                      | GAGAAGATGGTGAAGGTGGGG   | RT-PCR of <i>ga2ox2</i> mutants.  |
| GA2ox2 KOR                                      | AGCCAATCATCTTGCTCAGGG   | Wild type allele 320 bp.          |
| GA2ox3 KOF1                                     | GGAAGAGACTCCGGTCAAGGA   | RT-PCR of <i>ga2ox3-1</i> mutant. |
| GA2ox3 KOR1                                     | GCAATCATCTTGCTTTGGCAC   | Wild type allele 328 bp.          |
| GA2ox3 KOF2                                     | ACCGACTCAGATGCCAAAACC   | RT-PCR of <i>ga2ox3-2</i> mutant. |
| GA2ox3 KOF2                                     | TTTGCTCGACATTCTTTCATCTC | Wild type allele 345 bp.          |
| GA2ox4 KOF                                      | TTCGCTCTCAGCTCTCCTTCA   | RT-PCR of <i>ga2ox4</i> mutants.  |

|            |                        |                             |
|------------|------------------------|-----------------------------|
| GA2ox4 KOR | CCCGTTCGTCATCACCTGTAA  | Wild type allele 404 bp.    |
| GA2ox6 KOF | TTACGGATGCAAGAACATCGG  | RT-PCR of ga2ox6 mutants.   |
| GA2ox6 KOR | TTTGACCAACGCCACTTAACG  | Wild type size 320 bp.      |
| Actin-F2   | TCGTACAACCGGTATTGTGCTG | RT-PCR of Actin-2. Expected |
| Actin-R2   | TGGTGCAAGTGCTGTGATTTCT | product size 529 bp.        |

#### AMPLIFICATION OF TEMPLATES FOR STANDARD CURVES

| Primer     | Sequence                         | Used for                    |
|------------|----------------------------------|-----------------------------|
| GA2ox1 scF | CAAGGAAATATATCAATGGCGG           | <i>GA2ox1</i> cDNA fragment |
| GA2ox1 scR | AAAAGATGGGAGCGATGTTGA            |                             |
| GA2ox2 scF | CCTTCTTCTTCCTCAACCTTTCG          | <i>GA2ox2</i> cDNA fragment |
| GA2ox2 scR | TCCAAAACACTATCCATTTCCCTTC        |                             |
| GA2ox3 scF | ATGGTAATTGTGTTACAGCCAGCC         | <i>GA2ox3</i> cDNA fragment |
| GA2ox3 scR | CAAACATTGGATAGAGAAAATGGA<br>GG   |                             |
| GA2ox4 scF | ATGGTGAAAGGGTCCCAGAA             | <i>GA2ox4</i> cDNA fragment |
| GA2ox4 scR | CTAGTCCTTACATGTACGAAACAT<br>GTCT |                             |
| GA2ox6 scF | ATGGTTTTGCCATCTTCAACAC           | <i>GA2ox6</i> cDNA fragment |
| GA2ox6 scR | CTATAAAGTCTTGAAAACTCGAG<br>ACGA  |                             |

#### REAL-TIME QUANTITATIVE RT-PCR

| Primer    | Sequence               | Used for                     |
|-----------|------------------------|------------------------------|
| GA2ox1 qF | TGAGGACGAGAGGTTGTACGA  | <i>GA2ox1</i> quantification |
| GA2ox1 qR | TCCTTTCGAATTGTTGAAGCC  |                              |
| GA2ox2 qF | CCGGTTCTCACTTCCCATT    | <i>GA2ox2</i> quantification |
| GA2ox2 qR | GCTTCCGGATCGGCTAG      |                              |
| GA2ox3 qF | AGGAGAAGCTGAGCCGTTT    | <i>GA2ox3</i> quantification |
| GA2ox3 qR | TTCTCCGGGTAATGGTTCAT   |                              |
| GA2ox4 qF | GGCTCCAAGTGTCCAATTCA   | <i>GA2ox4</i> quantification |
| GA2ox4 qR | TCCTACATTGACGCAGAAAGC  |                              |
| GA2ox6 qF | GGGACAGAAGTCTAGCGAAGTG | <i>GA2ox6</i> quantification |
| GA2ox6 qR | TCGCTACGAACGTCTCTGATC  |                              |
| GA2ox7 qF | AGTAATGGAGTGTACCAAAGCG | <i>GA2ox7</i> quantification |

|              |                                   |                                 |
|--------------|-----------------------------------|---------------------------------|
| GA2ox7 qR    | GAAAGCTATTGACATCCTCTCG            |                                 |
| GA2ox8 qF    | GTGTGAGAAATACATGTTATCTAA<br>GGATG | <i>GA2ox8</i> quantification    |
| GA2ox8 qR    | TACACCTCCGATGGTTTGG               |                                 |
| At1g23205 qF | TGACCGTCCATTCTCAATCAG             | <i>At1g23205</i> quantification |
| At1g23205 qR | TTGCAGCTAGTACGGATGAAATC           |                                 |
| At2g21220 qF | AGAGCTTGCTTCAACAGGCAG             | <i>At2g21220</i> quantification |
| At2g21220 qR | CCACTCCCTCATCCGATCAT              |                                 |
| At2g45210 qF | AACG TTCAGGATACAACCGG             | <i>At2g45210</i> quantification |
| At2g45210 qR | AATGGTCTCATCAGCATGCA              |                                 |
| At5g45460 qF | GATGAGTTCCGCTCCTTATGG             | <i>At5g45460</i> quantification |
| At5g45460 qR | TGACTATGCTGCGGATCCA               |                                 |
| SCL3 qF      | GGAGAGGCCTTAGCCGTTAG              | <i>SCL3</i> quantification      |
| SCL3 qR      | GGCCAAGAAGGTATGCAATTG             |                                 |
